# Supplementary material
Source: MDPI journal article supplement (https://www.mdpi.com/2075-163X/8/1/28)
Supplement: s1 [file s1]

# Thermal Stability of Woolly Erionite-K and Considerations about the Heat-Induced Behaviour of the Erionite Group

Paolo Ballirano <sup>1,2,\*</sup>, Alessandro Pacella <sup>1</sup>, Andrea Bloise <sup>3</sup>, Matteo Giordani <sup>4</sup> and Michele Mattioli <sup>4</sup>

<sup>1</sup> Department of Earth Sciences, Sapienza University of Rome, Piazzale A. Moro 5, I-00185 Rome, Italy; alessandro.pacella@uniroma1.it

<sup>2</sup> Rectorial Laboratory Fibres and Inorganic Particulate, Sapienza University of Rome, Piazzale A. Moro 5, I-00185 Rome, Italy

<sup>3</sup> Department of Biology, Ecology and Earth Sciences, University of Calabria, Via Pietro Bucci, I-87036 Rende, CS, Italy; andrea.bloise@unical.it

<sup>4</sup> Department of Pure and Applied Sciences, University of Urbino Carlo Bo, Piazza della Repubblica 13, I-61029 Urbino, PU, Italy; matteo.giordani@uniurb.it (M.G.); michele.mattioli@uniurb.it (M.M.)

\* Correspondence: paolo.ballirano@uniroma1.it; Tel.: +39-06-49914967

This file includes the supporting information of the paper entitled “Thermal stability of woolly erionite-K and Considerations about the Heat Induced Behaviour of the Erionite Group”.

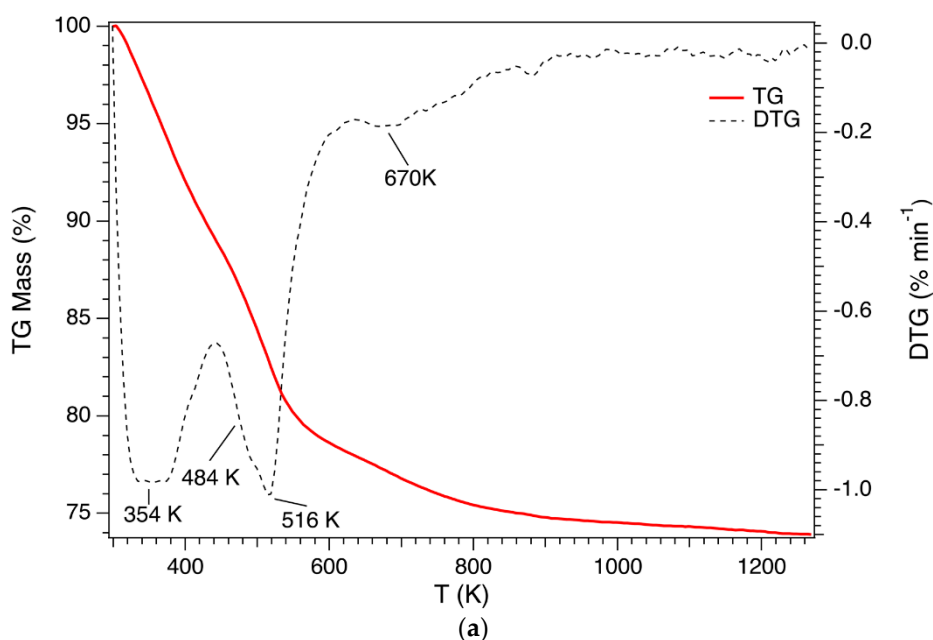

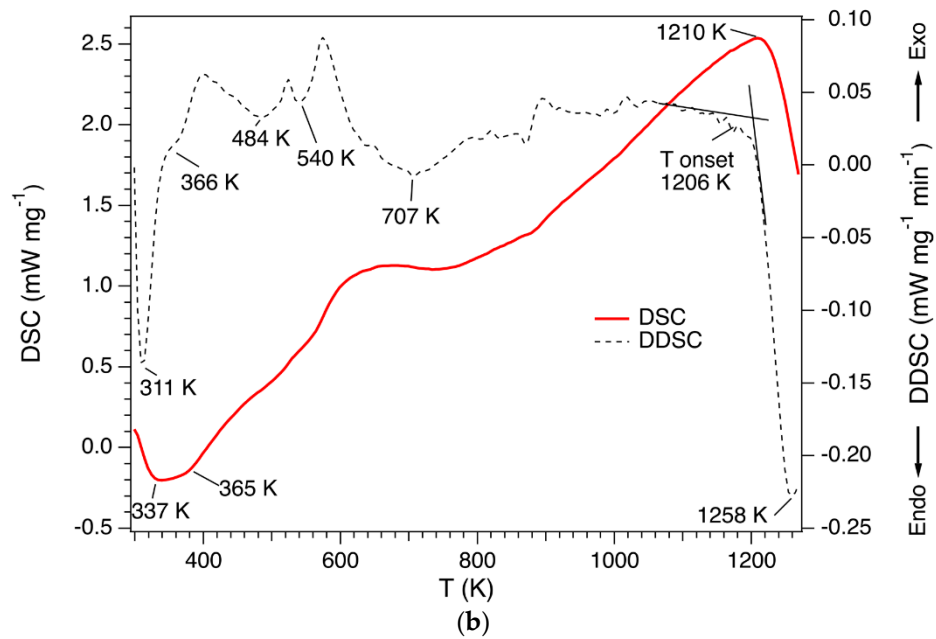

Figure S1. (a) TG and DTG curves; and (b) DSC and DDSC curves of the woolly erionite-K.

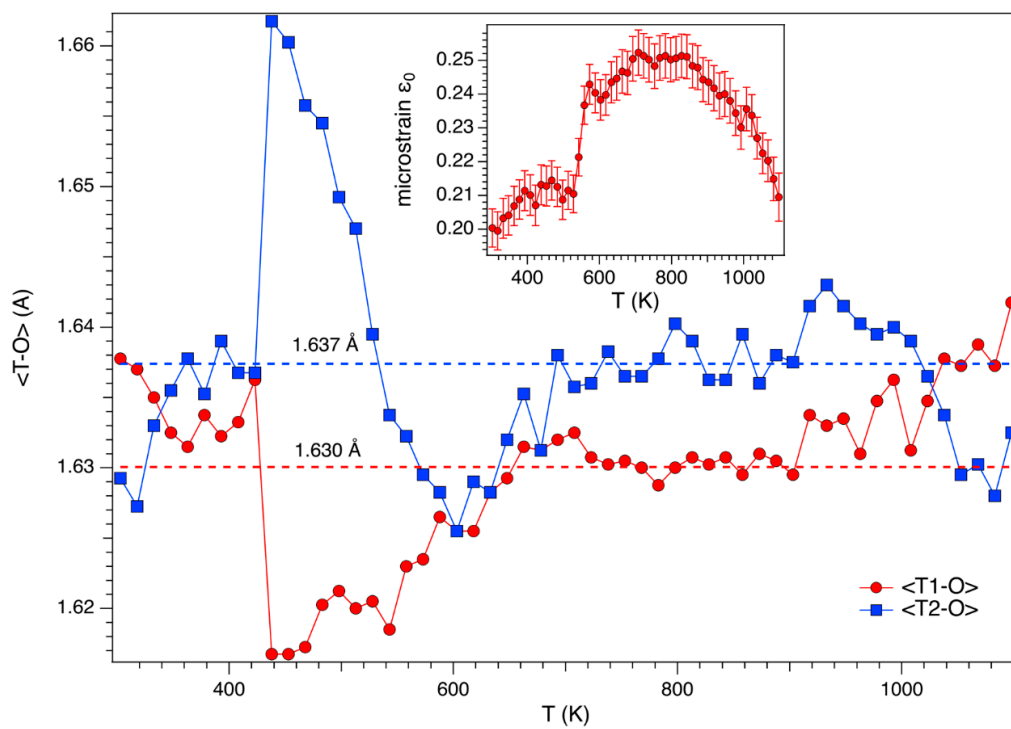

Figure S2.  $\langle T1-O \rangle$  and  $\langle T2-O \rangle$  bond distances as a function of temperature.

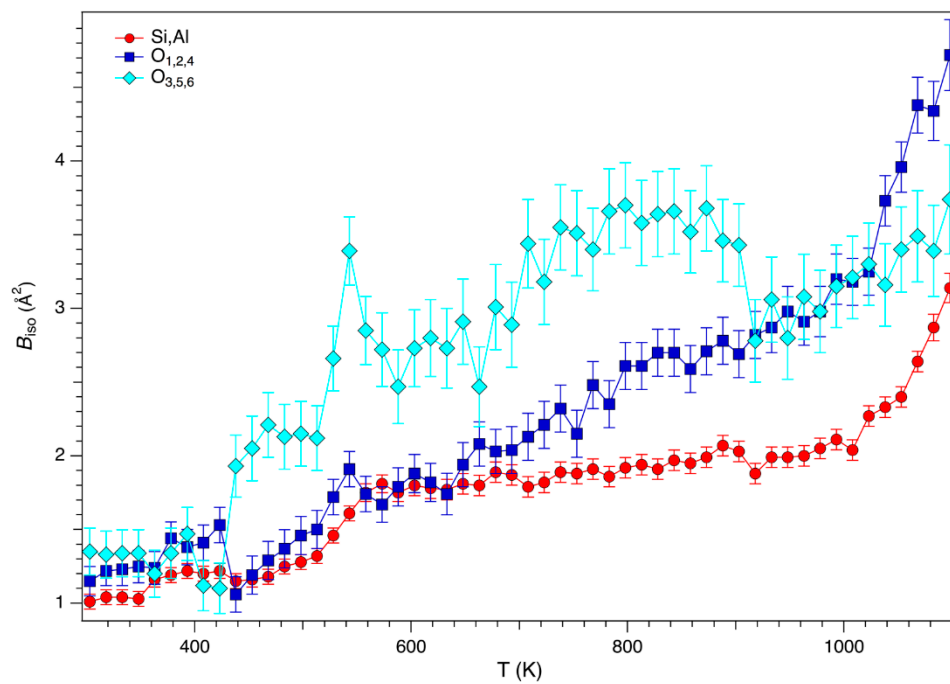

**Figure S3.** Isotropic displacement parameters of the T cations and of the oxygen atoms of the framework as a function of temperature.

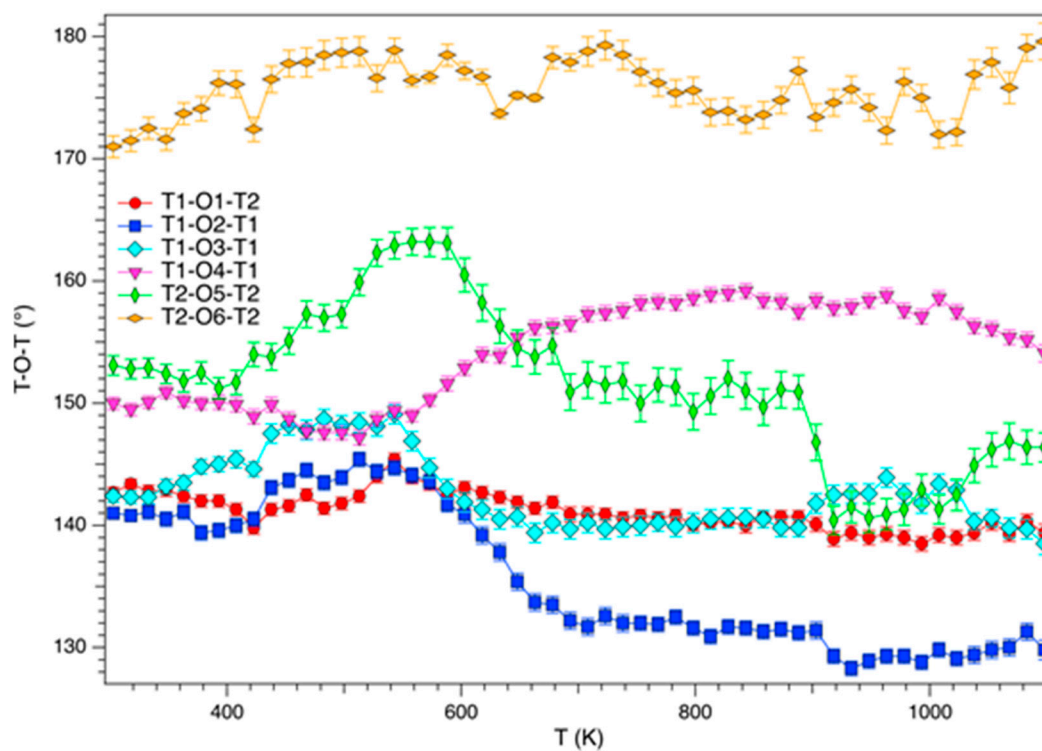

**Figure S4.** Evolution with temperature of the T-O-T bridges.

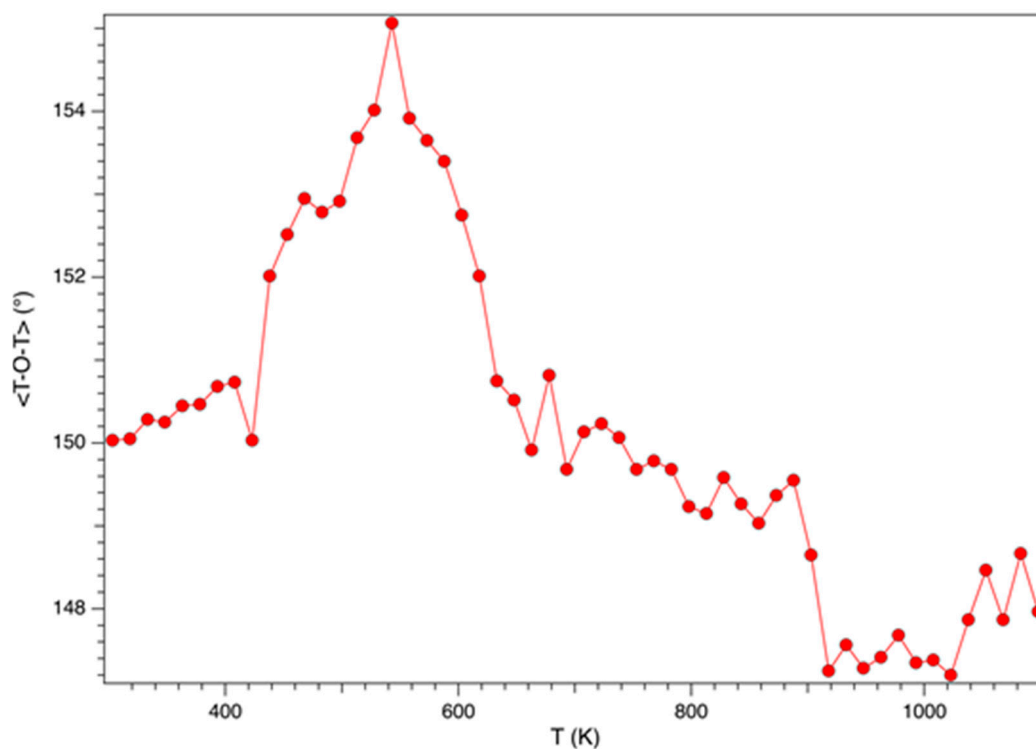

Figure S5. Evolution with temperature of the  $\langle T-O-T \rangle$  bond angle.

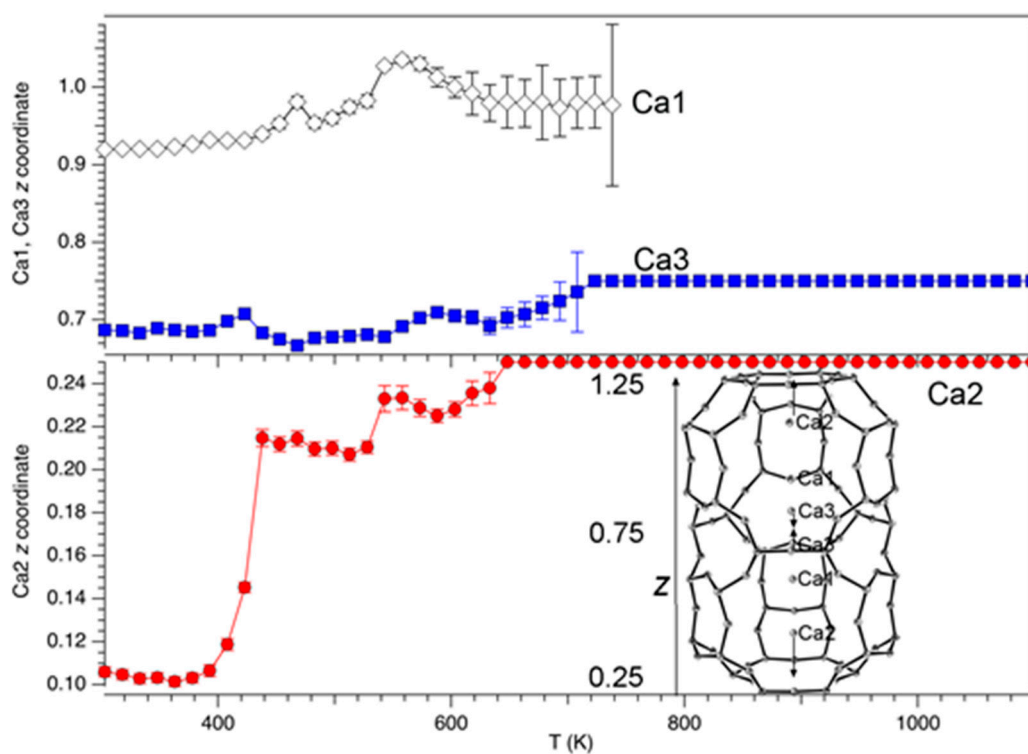

Figure S6. Dependence from temperature of the z coordinate of the Ca1, Ca2, and Ca3 sites. Inset: Ortep-3 [43] drawing of the location of the EF cation sites within the erionite cage.

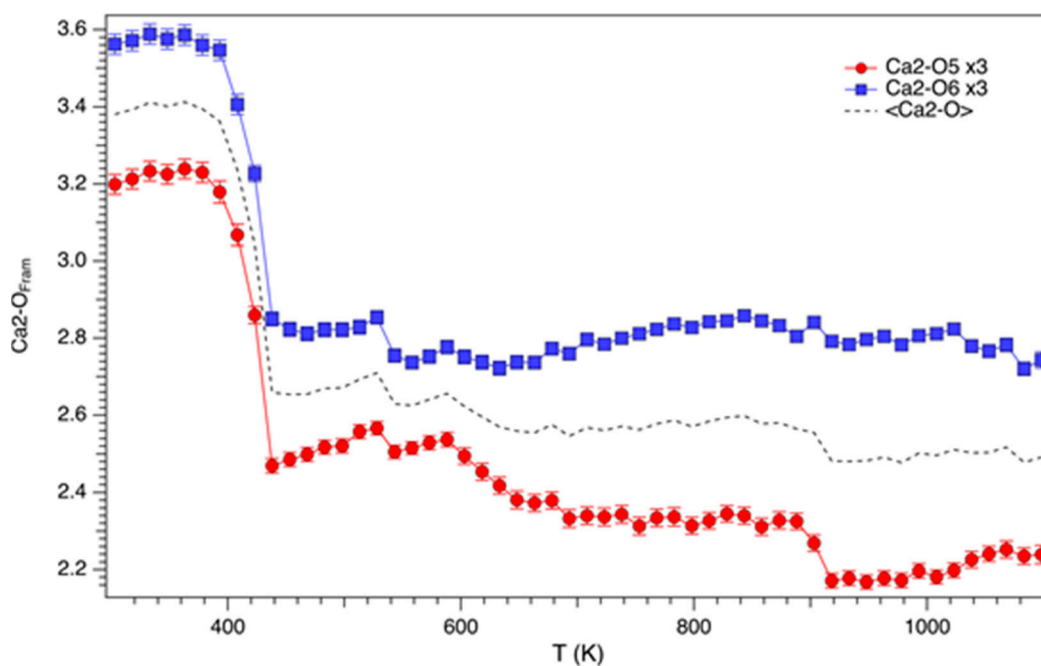

**Figure S7.** Dependence from temperature of bond distances between Ca2 and oxygen atoms of the framework.

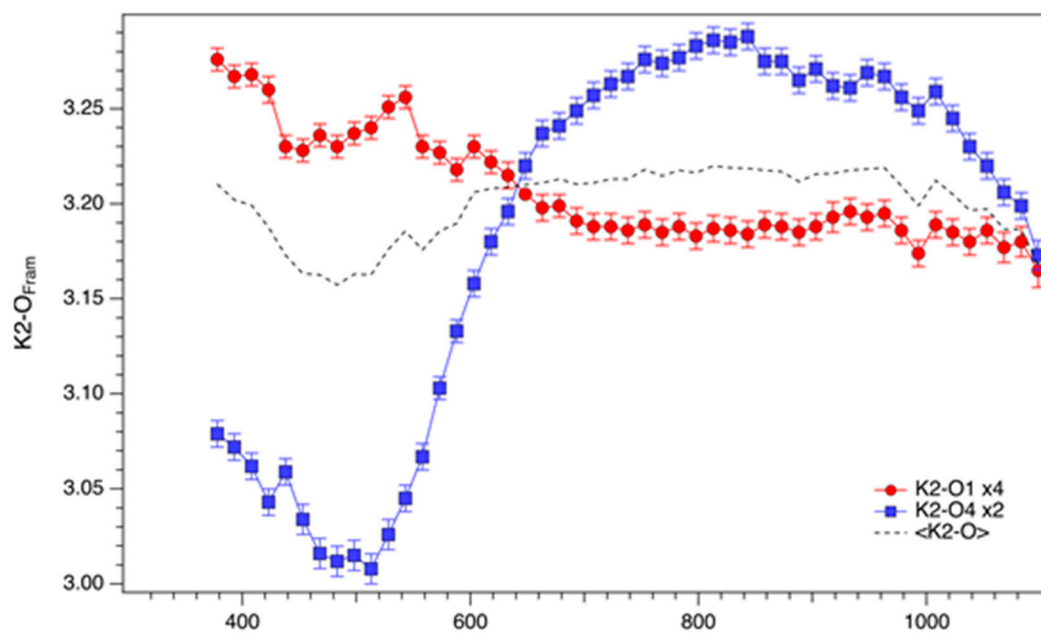

**Figure S8.** Dependence from temperature of bond distances between K2 and oxygen atoms of the framework.
